# Supplementary material
Source: PubMed Central journal article supplement (PMC6512331)

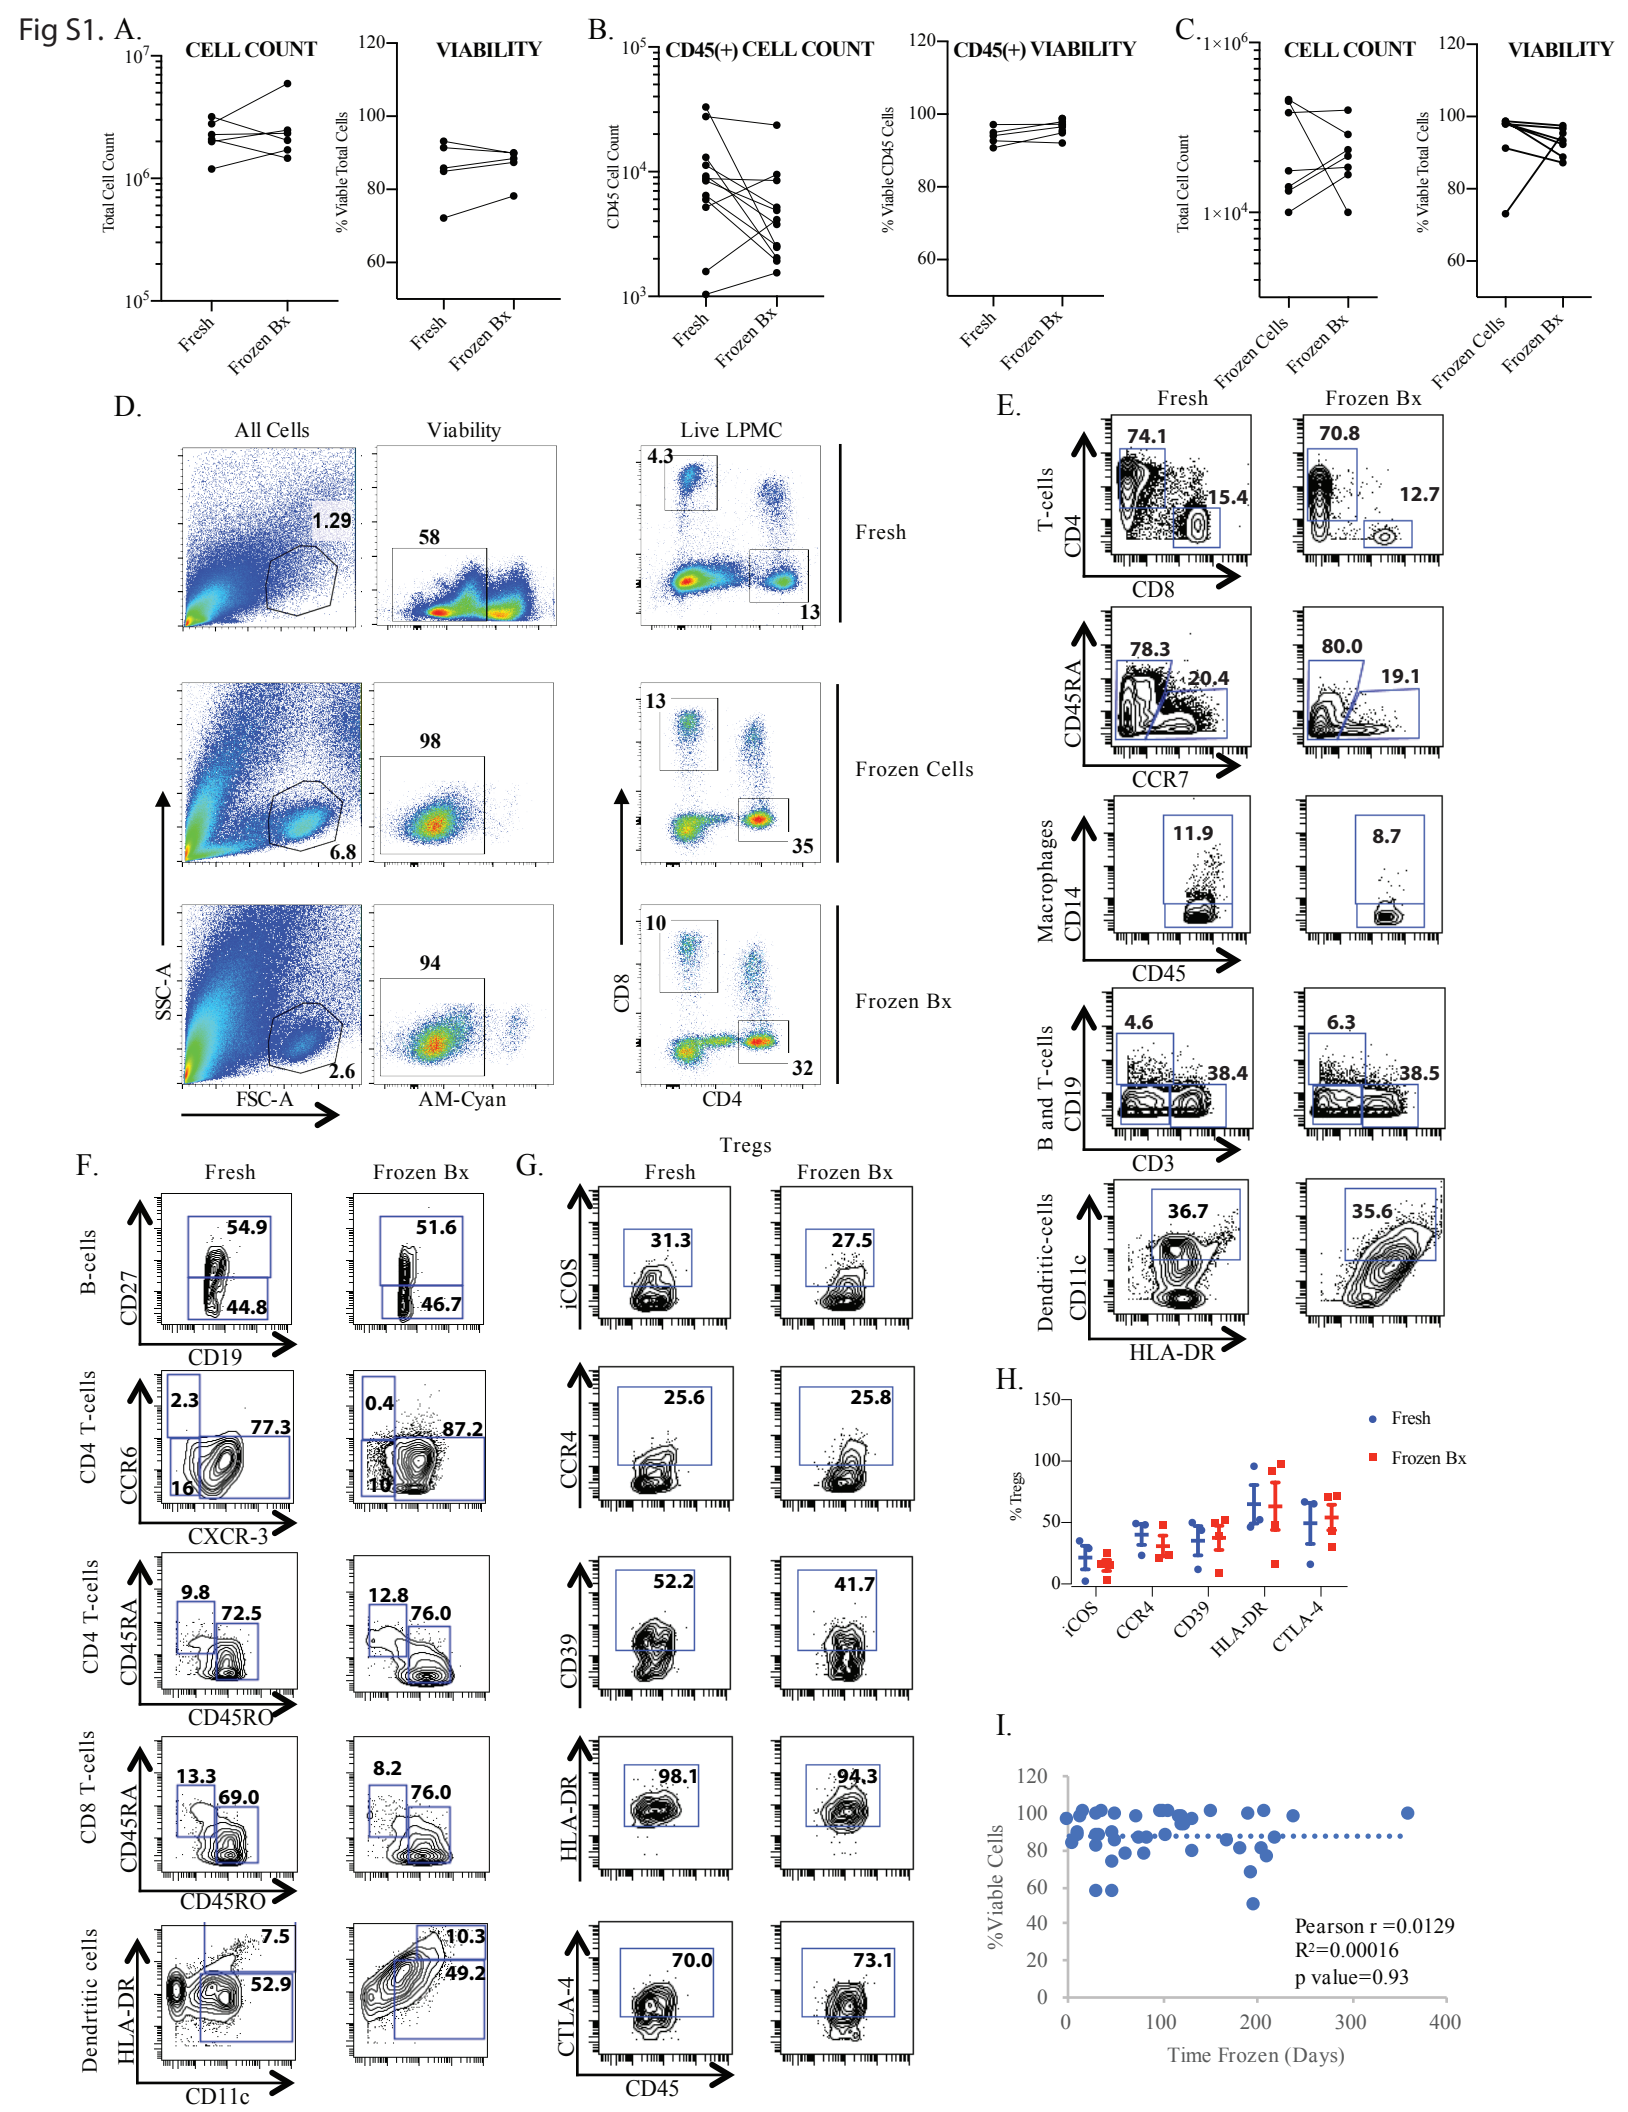

A. Fig S2

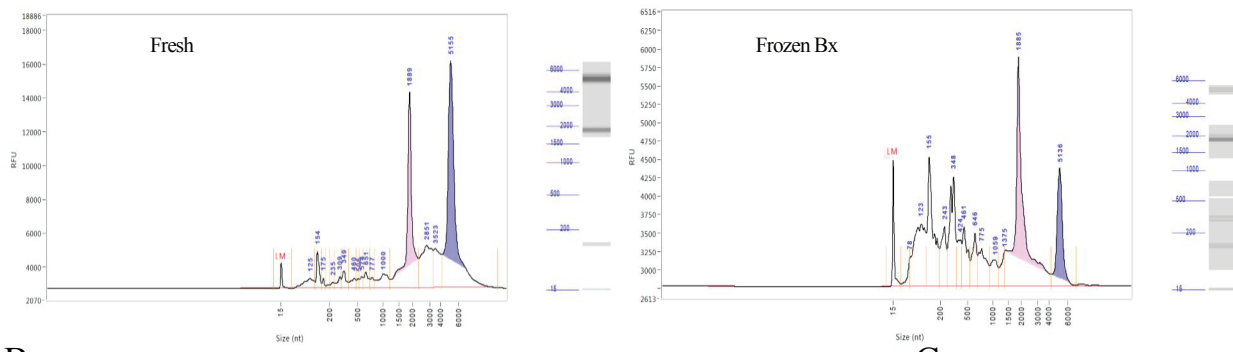

B.

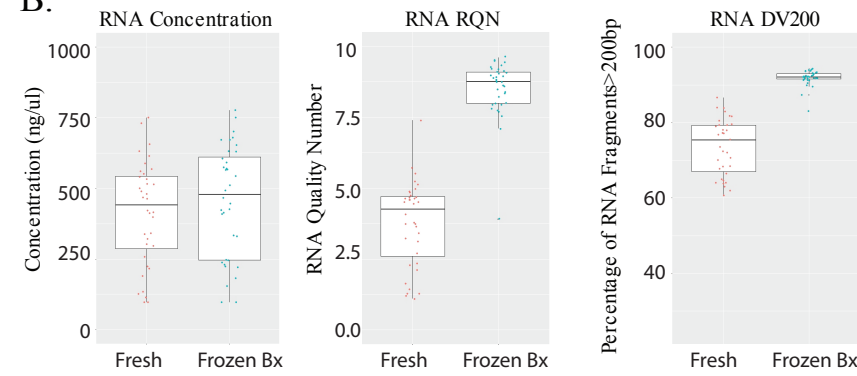

C.

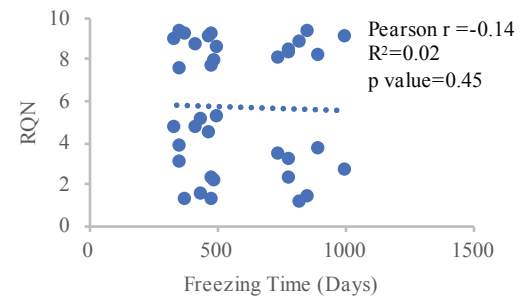

D.

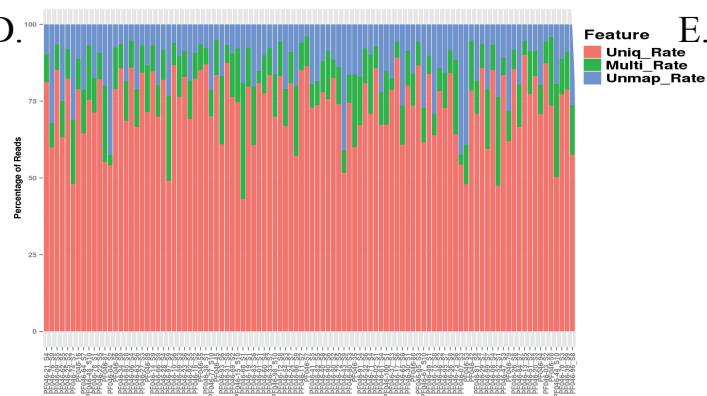

E.

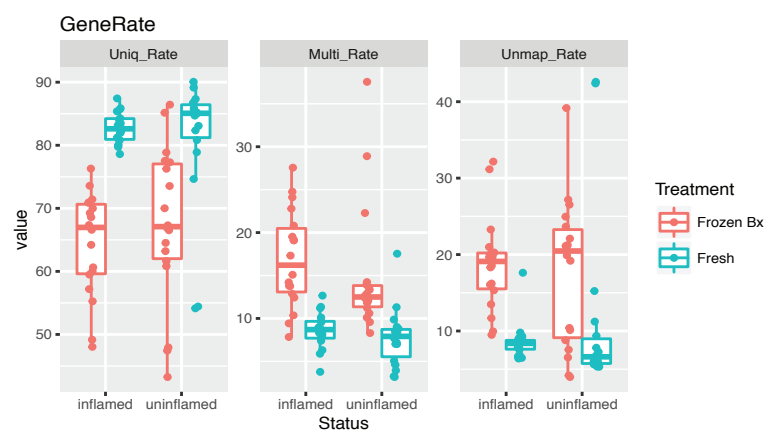

F.

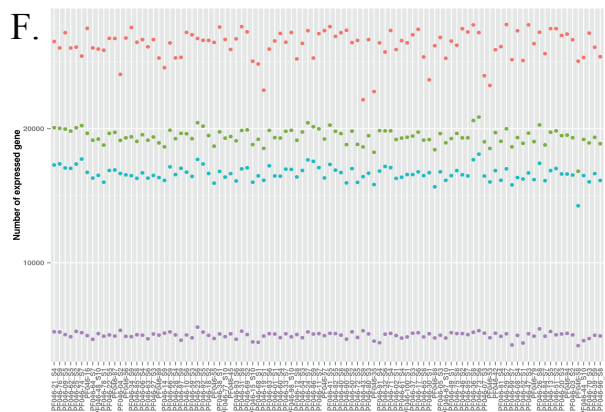

G.

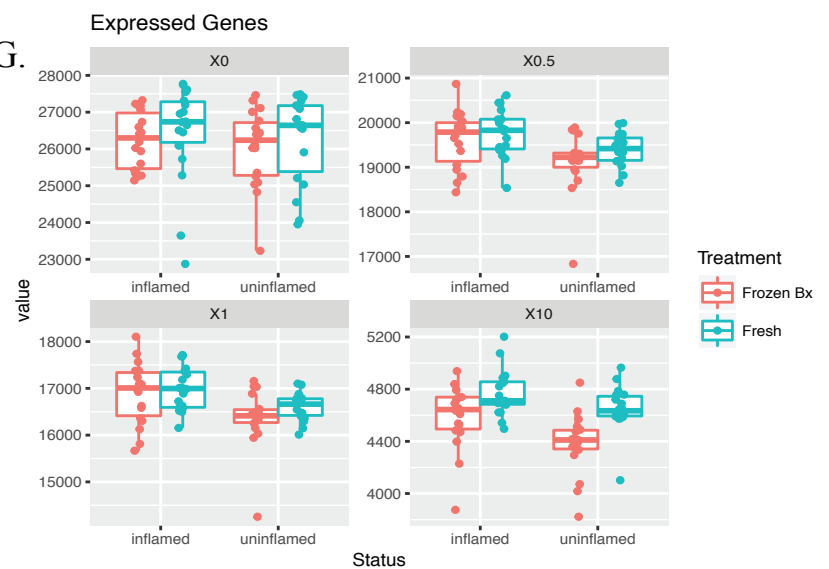

Figure S1. ***Gastrointestinal tissue can be cryopreserved with retention of cell viability.*** Comparison of (A) total cells and (B) CD45<sup>+</sup> cell numbers and viability of matched biopsies processed “fresh” or “frozen Bx”. Matched samples comparing total cell numbers obtained from cells frozen as LPMCs “frozen cells” or frozen tissue “frozen Bx” (C). Gating strategies for the FACS analysis of CD4<sup>+</sup> and CD8<sup>+</sup> T-cells after various processing methods indicated (D). 2-D plots obtained from CyTOF data using the general panel of the various populations indicated (E). T-cells were gated on viability/CD45<sup>+</sup>/CD3<sup>+</sup>. Tregs: viability/CD45<sup>+</sup>/CD3<sup>+</sup>/CD4<sup>+</sup>/CD25<sup>+</sup>/CD127<sup>-</sup>. Macrophages: viability/CD45<sup>+</sup>/CD3<sup>-</sup>/CD19<sup>-</sup>. Dendritic cells: viability/CD45<sup>+</sup>/CD3<sup>-</sup>/CD19<sup>-</sup>/CD14<sup>-</sup>. B- cells: viability/CD45<sup>+</sup>/CD3<sup>-</sup>/CD19<sup>+</sup>. 2-D plots obtained from CyTOF data using the general panel of subpopulations indicated (F). (G) shows the expression of the various markers indicated on Tregs (viability/CD45<sup>+</sup>/CD3<sup>+</sup>/CD4<sup>+</sup>/CD25<sup>+</sup>/FOXP3<sup>+</sup>) on the left-hand side and quantified (H) on the right. Cytokine panel used for staining. **(I) Correlation between percent of viable cells and the duration of freezing in days. Numbers on 2-D plots represent percentage of cells in gate.** \* = p value <0.05

Figure S2. ***Maintenance of unique gene expression patterns between inflamed and uninflamed tissue with cryopreservation*** Comparison of RNA obtained after storage in RNAlater or DMSO. (A and B) quantification of quality of RNA obtained from storage in RNAlater or DMSO. **(C) Correlation between RQN and duration of freezing in days.** (D-H) Gene expression and mapping by the two methods.

## **SUPPLEMENTARY METHODS**

### **Tissue procurement**

**Boston** Two to four 2mm x 2mm biopsies per area were collected using either adult or pediatric biopsy forceps. Sections of discarded surgical tissue were collected from partial or full colonic resections. The muscle layer was removed and the remaining mucosa was cut into 2mm x 2mm pieces. All biopsies and tissue samples were collected in T-cell media (RPMI 1640 medium, 50 mL FBS plus 5 mL of each: Pen/Strep, NEAA, sodium pyruvate, Glutamax, HEPES, 50 mL FBS, 5 mL Pen Strep) and were stored on ice until cryopreservation or LPMC isolation.

**MSSM** Directly after surgical resection, two pieces of ileum (4 cm square each), one from the inflamed and one from the non-inflamed gut section were cut by a pathologist. The pieces were put in RPMI 1640 medium supplemented with penicillin and 10% fetal bovine serum (FBS) at 4°C and immediately processed for immunological analysis. Mucosal biopsies were performed from each piece with endoscopic forceps, pooled and incubated for 30 min at 37°C in dissociation medium (HBSS w/o Ca<sup>++</sup> and Mg<sup>++</sup>, containing 5 mM EDTA and 10mM HEPES) in order to remove epithelial cells.

**Penn** Two biopsies per patient were obtained from the colon using a 2.4 mm biopsy forceps and were placed in 10 ml cold phosphate buffered saline (PBS). The samples were stored on ice and processed within 2 hours of collection.

### **Cryopreservation**

Fresh biopsies, surgical tissue (4-5 pieces), and isolated LPMCs were slow frozen, resuspended in 1 mL of freeze medium (10% dimethyl sulfoxide (DMSO) (Sigma) and 90% fetal bovine serum (FBS)(Gibco), and promptly placed in a Nalgene Mr. Frosty freezing container (Sigma-Aldrich, St. Louis, MO) to freeze at a 1°C per minute cooling rate in a -80°C freezer. Samples were stored at -80°C for at least 90 minutes and transferred to liquid nitrogen for longterm storage. Upon thawing, LPMC isolation was carried out as described below.

For enteroid culture, fresh biopsies were collected in Advanced DMEM/F12 (Gibco) and transferred to 1 mL freezing medium and slow frozen as described above.

### **Penn: Cryopreservation of biopsies prior to LPMC isolation**

Two biopsies per patient were obtained from the colon using a 2.4 mm biopsy forceps and were placed directly in a cryovial containing 1 ml freeze medium. The samples were then frozen and stored as described above.

### **LPMC Isolation of Fresh and Frozen Biopsies and Tissue Samples**

**LPMC Isolation (Boston)** Cryovials containing frozen biopsies or surgical tissue were quickly thawed at 37°C. After removing freezing media, samples were washed in either T-cell media or -Ca, -Mg PBS (1:5000 collagenase and DNase) then transferred to 20 mL of digestion media in 50 mL conical tubes. Fresh biopsies were transferred from T-cell media to digestion media. Conical tubes were secured horizontally to a shaker set to 200 rpm. Samples were digested overnight at 37°C and then were resuspended and returned to the shaker for 1 hour. After digestion, the samples were vortexed for 30 seconds and then poured through a 70 µm cell strainer. The supernatant was then spun at 1400 rpm for 5 min to pellet the LPMCs.

**LPMC Isolation (MSSM)** Fresh biopsies were washed twice in complete RPMI and then incubated for 45 min at 37°C in digestion medium (HBSS with Ca<sup>++</sup> Mg<sup>++</sup> containing 2% FBS, 0.5mg/ml DNaseI and 0.5mg/ml Collagenase IV). The resulting cell suspension was filtered and washed with complete RPMI and cells collected were centrifuged, washed and resuspended in PBS.

**LPMC Isolation (Penn)** Cryovials containing frozen LPMCs were placed at 37°C until they began to thaw. The samples were transferred to 15 ml tubes containing 10 ml warm cell culture medium, centrifuged at 1200 rpm for 10 minutes at room temperature, and the pellet was washed with 10 ml warm cell culture medium. After the 2nd spin, samples were resuspended in 2 ml warm cell culture medium in 48-well plates, and rested overnight in a 37°C incubator with 5% CO<sub>2</sub>. For samples that had not been processed into LPMCs prior to freezing, LPMC isolation was carried out as described above after thawing, and then the cells were rested overnight.

### **Primary Human Enteroid Culture**

Biopsies were collected in Advanced DMEM/F12 (Gibco) on ice. For fresh biopsy culture, the epithelium was immediately isolated by a 40 minute Collagenase Type 1 (Gibco) digestion at 37°C followed by mechanical disruption of the tissue by a P1000 pipette tip. The isolated epithelium was suspended in Growth Factor Reduced Phenol Red Free Matrigel (Corning) and plated as 50 uL domes in a tissue culture-treated 24-well plate (Genesee). After the Matrigel was set at 37°C for 10 minutes, the cultures were maintained in complete human small intestinal medium [For 100 mL: 50 mL NRW Conditioned Medium, 30 mL Advanced DMEM/F12 (Gibco), 1 mL Glutamax (Gibco), 1 mL HEPES (Gibco), 1 mL Nicotinamide (1 M, Sigma), 1 mL B27 (Gibco), 500 uL N2 (Gibco), 200 uL Primocin (Invivogen), 200 uL Normocin (Invivogen), 100 uL N-Acetyl Cysteine (500 mM, Sigma), 100 uL A-83-01 (0.5 mM, Sigma), 33.2 uL SB202190 (5 mg in 505 uL DMSO, Sigma), 10 uL EGF (500 ug/mL, Peprotech), 10 uL Gastrin (500 uM, Sigma)] at 37°C with 5% CO<sub>2</sub> as previously described (Sato et al.).

For frozen biopsy culture, the samples were rapidly defrosted at 37°C and immediately cultured as described above. Media was changed every 3 days and cultures were passaged as necessary, every 7 to 10 days. Passaging was performed by incubating with Cell Recovery Solution (Corning) on ice for 40 minutes. The recovered enteroids were then suspended in the desired amount of

Matrigel and passed rapidly through the bent tip of a P1000 pipette tip to mechanically digest before replating. A primary enteroid culture was considered to be 'established' if able to be expanded to 12 robust wells after passage.

### **CyTOF analysis (Boston and MSSM)**

**Boston** LPMC suspensions of 1.5-2 million cells per aliquot were labeled with Rh103 intercalator (Fluidigm) for 20 minutes at room temperature to label non-viable cells, and washed in Cytof Staining Buffer (Ca-,Mg- PBS, NaN<sub>3</sub>, 2.5g Bovine Serum Albumin). The cells were then treated with Fc block for 10 minutes. The cells were either stained with the "general" panel of metal-labeled antibodies (0.5 µl/antibody/sample) for 30 minutes, or the cells were first stained with surface marker antibodies of the "cytokine panel" (0.5 µl/antibody/sample) for 30 minutes, and then washed twice in CSB and fixed with Foxp3 Fix/Perm (Biolegend) for 45 minutes. These fixed cells were washed twice in Foxp3 wash buffer (Biolegend) and stained with the intracellular antibodies of the "cytokine" panel (0.5 µl/antibody/sample). After staining with either the "general" panel or intracellular "cytokine" panel antibodies, the cells were washed twice with CSB and fixed with 1.6 % PFA in CSB for 10 minutes. The cells were then stored in CSB at 4°C until they were ready to run. Immediately prior to the run, the CSB was removed and the cells were incubated with 0.125µM Ir intercalator 1:1000 in CSB (Fluidigm) for 20 minutes. The cells were then washed twice in CSB and twice in deionized (MilliQ) water, and then resuspended at a concentration of 1 million cells/mL in deionized (MilliQ) water containing a 1:10 dilution of EQ 4 Element Beads (Fluidigm). The samples were run on a CyTOF2 (Fluidigm) equipped with a SuperSampler fluidics system (Victorian Airships) at an event rate of <500 events/second.

**MSSM** Tissue cell suspensions were first labeled with Rh103 intercalator (Fluidigm) for 20 minutes at 37°C to label non-viable cells, and then washed and labeled with a panel of metal-labeled antibodies and incubated for 30 mins on ice. The samples were then fixed and permeabilized with BD Cytofix/Cytoperm (BD Biosciences) and incubated in 0.125nM Ir intercalator (Fluidigm) diluted in PBS containing 2% formaldehyde for 30 mins. The samples were then washed and stored in PBS containing 2% FBS at 4°C until acquisition.

Immediately prior to acquisition, samples were washed once with PBS, once with de-ionized water and then resuspended at a concentration of 1 million cells/ml in deionized water containing a 1:20 dilution of EQ 4 Element Beads (Fluidigm). The samples were acquired on a CyTOF2 (Fluidigm) equipped with a SuperSampler fluidics system (Victorian Airships) at an event rate of <500 events/second.

### **Flow cytometry (Penn)**

LPMCs that had been rested overnight were counted, centrifuged at 1200 rpm for 10 minutes at room temperature, and resuspended in 100  $\mu$ l FACS buffer (PBS with 0.5% FBS) containing fluorophore-labeled antibodies. Staining was carried out at room temperature for 30 minutes. Antibodies used are documented in the Key Resource Table. Data analysis was performed using FlowJo (version 10.3) software (LLC, Ashland, OR). Dead cells were removed by gating on a LIVE/DEAD Aqua kit (Invitrogen, Carlsbad, CA) versus forward scatter (FSC-H).

### **RNaseq (Pfizer)**

RNA was extracted from individual biopsies utilizing the Qiagen (Valencia, CA) miRNA kit and homogenized on a Bertin Precellys Homogenizer (Rockville, MD) system using ceramic beads. RNA concentration was assessed with the Nanodrop 8000 system (Wilmington, DE) and quality with Advanced Analytical's Fragment Analyzer (Ankeny, IA).

RNaseq was performed using the Truseq Total RNaseq kit with RiboZero (Illumina, San Diego CA). The resulting libraries were quantified and checked for quality using the Agilent TapeStation System (Santa Clara, CA). Libraries were pooled to equimolar concentrations and sequenced on a Nextseq 500 system (Illumina, San Diego CA) targeting 30 million 75bp reads (60 million paired reads) per sample. Sequencing run quality was assessed using Illumina's SAV software and demultiplexed with Illumina's bcl2fastq algorithm (Illumina, San Diego CA). Processing of the fastq files was performed using the QuickRNaseq<sup>20</sup> pipeline utilizing Hg38 for the genome and Gencode v24 for annotation.

## **QUANTIFICATION AND STATISTICAL ANALYSIS**

### **CytoF data analysis**

CytoF FCS files were normalized using bead-based normalization in the CytoF software and uploaded to Cytobank for analysis. Data were visualized using viSNE, and major immune populations were gated based on canonical marker expression. Cell population frequencies were exported for comparisons across freezing conditions.

**CytoF and Flow Cytometry Quantification and Statistical Analysis (Penn, Boston, MSSM)** Statistical parameters including number of biological replicates, data dispersion and precision measures (mean and SEM), and statistical significance by Student's T test appears in Figures and Figure Legends. Statistical analysis was performed using GraphPad Prism 7.

### **Enteroid Culture Analysis**

Cultures were imaged using the EVOS FL Auto 2 (ThermoFisher). All representative images are from mature cultures after at least 2 passages. Scale bars were inserted using ImageJ.

### **RNaseq Analysis**

RNAseq counts were normalized using the EdgeR algorithm and the voom function of limma<sup>21 22</sup>. Differential analysis was performed using limma<sup>22</sup> to compare samples by inflammatory status and collection method. Genes with expression less than 10 counts per million (cpm) in all samples were removed from analysis, and genes with a p-value <0.001 and FC>+/-2 are reported as significant. Output of the limma analysis was used for functional enrichment analysis for KEGG pathways using the tmod R package v 0.31 (1, see below) and the output was visualized using ggplot2 v 2.2.1(2, see below)

1. <https://cran.r-project.org/web/packages/tmod/index.html>

2. <https://cran.r-project.org/web/packages/ggplot2/index.html>





## Table of Contents

|                                                            |    |
|------------------------------------------------------------|----|
| 1. Purpose .....                                           | 2  |
| 2. Background .....                                        | 2  |
| 3. Materials .....                                         | 3  |
| 4. Reagents/Solutions .....                                | 5  |
| 5. Tissue procurement .....                                | 7  |
| 6. Cryopreservation.....                                   | 8  |
| 7. Thawing biopsy and tissue samples .....                 | 9  |
| 8. Primary human enteroid culture.....                     | 10 |
| 9. RNAseq analysis of biopsy tissue.....                   | 11 |
| 10. Lamina propria mononuclear cell (LPMC) isolation ..... | 12 |
| 11. References.....                                        | 14 |

## **1. Purpose**

1.1. This Standard Operating Procedure (SOP) includes procedures for tissue procurement, cryopreservation, thawing, lamina propria mononuclear cells (LPMCs) and epithelial cell isolation and utilization of LPMSc and epithelial cells from intestinal biopsies and tissue.

## **2. Background**

2.1 Identification of human immune cell subsets and function underlining disease pathogenesis and response to therapy is a conundrum challenging personalized medicine approach to immune-mediated disorders. Detailed analyses of immune-mediated disorders affecting mucosal surfaces have been particularly difficult, as analyses have required processing of fresh tissue that is often time consuming and requires sophisticated laboratory techniques not universally available. Here, we present a simple universal method to immediately cryopreserve mucosal tissue that retains cellular viability, including immune and epithelial components.

### 3. Materials

#### 3.1. Tissue Procurement

- 1 mL cryovials (Nalgene® SYSTEM 100™ Cryogenic Vials)
- Ice
- Ice container
- 50 mL conical tubes

#### 3.2. Cryopreservation

- 1 mL cryovials (Nalgene® SYSTEM 100™ Cryogenic Vials)
- Pipette tips
- Curved scissors
- Nalgene Mr.Frosty with isopropanol (Sigma-Aldrich, St. Louis, MO), kept at room temperature between uses
- -80 °C freezer
- Liquid nitrogen freezer

#### 3.3. Thawing Biopsies and tissue samples

- Pipette tips
- Vortex
- 37°C water bath
- 50 ml conical tubes
- Centrifuge

#### 3.4. Primary human enteroid culture

- 1 mL cryovials (Nalgene® SYSTEM 100™ Cryogenic Vials)
- Pipette tips
- Ice
- 24 well plate (tissue culture treated) (Genesee)
- cell culture incubator
- centrifuge

#### 3.5. RNAseq analysis of biopsy tissue

- Qiagen (Valencia, CA) miRNA kit
- Bertin Precellys Homogenizer (Rockville, MD)
- Nanodrop 8000 system (Wilmington, DE)
- Advanced Analytical's Fragment Analyzer (Ankeny, IA)
- Truseq Total RNAseq kit with RiboZero (Illumina, San Diego, CA).
- Agilent TapeStation System (Santa Clara, CA)
- Nextseq 500 system (Illumina, San Diego, CA)
- Pipette tips
- 15 mL conical tubes

## Gastrointestinal Tissue Procurement, Cryopreservation and Utilization SOP

### 3.6. LPMC isolation

- 37°C Shaker
- 50 ml conical tubes
- 10 ml pipettes
- Centrifuge
- Vortex
- 70-micron filter
- 5 mL plastic syringe piston

# Gastrointestinal Tissue Procurement, Cryopreservation and Utilization SOP

## 4. Reagents/Solutions

### 4.1. Tissue procurement

- **T-cell media:** 500 mL RPMI 1640 media (Gibco), 50 mL Fetal Bovine Serum (FBS), 5 mL of each: NEAA (Gibco), Sodium Pyruvate, GlutaMAX (Gibco), HEPES (Gibco), Penicillin/Streptomycin (Pen/Strep)

### 4.2. Cryopreservation

- **Freezing media:** 90% Fetal Bovine Serum (FBS), 10% DMSO

### 4.3. Thawing biopsies and tissue samples

- Ice cold PBS (1X) with 5% FBS
- PBS (1X)

### 4.4. Primary human enteroid culture

- **Epithelial digestion media-organoids:** HBSS (without Ca<sup>2+</sup>/Mg<sup>2+</sup>) + 2mg/mL collagenase type1 (Gibco)
- **Complete human small intestinal medium:** For 100 mL: 50 mL NRW Conditioned Medium, 30 mL Advanced DMEM/F12 (Gibco), 1 mL GlutaMAX (Gibco), 1 mL HEPES (Gibco), 1 mL Nicotinamide (1 M, Sigma), 1 mL B27 (Gibco), 500 uL N2 (Gibco), 200 uL Primocin (InvivoGen), 200 uL Normocin (InvivoGen), 100 uL N-Acetyl Cysteine (500 mM, Sigma), 100 uL A-83-01 (0.5 mM, Sigma), 33.2 ul SB202190 (5 mg in 505 ul DMSO, Sigma), 10 uL EGF (500 ug/mL, PeproTech), 10 uL Gastrin (500 uM, Sigma)
- Collagenase Type 1 (Gibco)
- Matrigel (Corning)
- Cell Recovery Solution (Corning)

### 4.5. LPMC isolation

- **Epithelial denudation medium:** HBSS (without Ca<sup>2+</sup>/Mg<sup>2+</sup>) + 1mM EDTA (10mL EDTA), 10mM HEPES (5mL HEPES), 0.5% FBS (2.5mL FBS), 0.115g DTT
- **Digest medium (high enzyme):** T-cell media with 0.5mg/mL DNase I and 0.5mg/mL Collagenase IV
- **Digest medium (low enzyme):** T-cell media with 2uL of collagenase IA stock 50mg/mL and 2uL of DNase I stock 5mg/mL (10,000 IU/mL) per 10 mL of medium

## **Gastrointestinal Tissue Procurement, Cryopreservation and Utilization SOP**

- **T-cell media:** 500 mL RPMI 1640 media (Gibco), 50 mL Fetal Bovine Serum (FBS), 5 mL of each: NEAA (Gibco), Sodium Pyruvate, GlutaMAX (Gibco), HEPES (Gibco), Penicillin/Streptomycin (Pen/Strep)
- PBS (1X)

## Gastrointestinal Tissue Procurement, Cryopreservation and Utilization SOP

### 5. Tissue procurement

#### 5.1. Biopsy Tissue

- 5.1.1. Endoscopically obtain biopsies with 2.4 mm biopsy forceps.
- 5.1.2. Collect 2-4 per biopsies per vial and place in 1 mL of cold **T-cell media** in a 1 mL cryovial if using for LPMC isolation.
- 5.1.3. Store on ice until ready for cryopreservation.
- 5.1.4. Process all tissue within 30 minutes of collecting.

#### 5.2. Surgical Tissue

- 5.2.1. Obtain discarded resected tissue from the operating room.
- 5.2.2. Place in 20 mL of cold **T-cell media** in a 50 mL conical tube.
- 5.2.3. Store on ice until ready for cryopreservation.
- 5.2.4. Process all tissue within 30 min of collecting.



## Gastrointestinal Tissue Procurement, Cryopreservation and Utilization SOP

### 6. Cryopreservation

#### 6.1. Biopsies

- 6.1.1. Aspirate the **T-cell media** from the cryopreservation vial, being careful not to aspirate the biopsies.
- 6.1.2. Replace the **T-cell media** with 1 mL of **freezing media**.
- 6.1.3. Place samples promptly in a Nalgene Mr. Frosty freezing container to freeze at a 1°C per minute cooling rate in a -80°C freezer.
- 6.1.4. Transfer the samples to a liquid nitrogen freezer within 24-48 hours of collecting.

#### 6.2. Surgical tissue

- 6.2.1. Cut the tissue into 2 mm size pieces with curved scissors.
- 6.2.2. Place 5-10 biopsy-sized pieces per 1 mL cryovial.
- 6.2.3. After aspirating any excess T-cell media, add 1 mL of **freezing media** to each vial.
- 6.2.4. Place samples promptly in a Nalgene Mr. Frosty freezing container to freeze at a 1°C per minute cooling rate in a -80°C freezer.
- 6.2.5. Transfer the samples to a liquid nitrogen freezer within 24-48 hours of collecting.

## Gastrointestinal Tissue Procurement, Cryopreservation and Utilization SOP

### 7. Thawing biopsies and tissue samples

- 7.1.1. When ready to use the biopsy or tissue, thaw the samples quickly by placing the cryovial in a 37°C water bath for 20-60 seconds.
- 7.1.2. Dilute the cryovial with cold PBS containing 5% FBS.
- 7.1.3. Transfer to a 50 ml conical tube
- 7.1.4. Add 10 ml of cold PBS with 5% FBS
- 7.1.5. Spin down at 1400 rpm for 5 min
- 7.1.6. Discard PBS
- 7.1.7. Replace with another 10ml of ice cold PBS with 5% FBS, wash and spin again
- 7.1.8. Discard the remaining PBS
- 7.1.9. Tissue is ready for further processing

## Gastrointestinal Tissue Procurement, Cryopreservation and Utilization SOP

### 8. Primary human enteroid culture

#### 8.1. Generating primary human enteroid culture

- 8.1.1. After thawing the frozen tissue or biopsies to isolate epithelial cells, digest the tissue for 40 minutes in **Epithelial digestion media-organoids** at 37°C.
- 8.1.2. Mechanically disrupt the tissue using a P1000 pipette tip
- 8.1.3. Suspend the isolated epithelium in **Growth Factor Reduced Phenol Red Free Matrigel** (Corning).
- 8.1.4. Plate as 50 uL domes in a tissue culture-treated 24-well plate (Genesee)
- 8.1.5. Let the matrigel set at 37°C for 10 minutes.

#### 8.2. Maintaining primary human enteroid culture

- 8.2.1. Maintain cultures in **complete human small intestinal medium** at 37°C with 5% CO<sub>2</sub> as previously described<sup>1, 2</sup>.
- 8.2.2. Change media every 3 days.
- 8.2.3. Passage cultures as necessary, every 7 to 10 days.
- 8.2.4. Passaging is performed by incubating with **Cell Recovery Solution** (Corning) on ice for 40 minutes.
- 8.2.5. Suspend the recovered enteroids in the desired amount of **Matrigel**.
- 8.2.6. Pass rapidly through the bent tip of a P1000 pipette tip to mechanically digest before re-plating.
- 8.2.7. A primary enteroid culture is considered to be 'established' if able to be expanded to 12 robust wells after passage.

## Gastrointestinal Tissue Procurement, Cryopreservation and Utilization SOP

### 9. RNAseq analysis of biopsy tissue

#### 9.1. RNA extraction

- 9.1.1. Extract the RNA from individual biopsies utilizing the Qiagen (Valencia, CA) miRNA kit per their protocol.
- 9.1.2. Homogenize on a Bertin Precellys Homogenizer (Rockville, MD) system using ceramic beads.
- 9.1.3. Assess the RNA concentration with the Nanodrop 8000 system (Wilmington, DE).
- 9.1.4. Assess the quality of the RNA with the Advanced Analytical's Fragment Analyzer (Ankeny, IA).

#### 9.2. RNAseq analysis

- 9.2.1. Perform the RNAseq using the Truseq Total RNAseq kit with RiboZero (Illumina, San Diego, CA), following their instructions.
- 9.2.2. Quantify the resulting libraries for quality using the Agilent TapeStation System (Santa Clara, CA).
- 9.2.3. Pool libraries to equimolar concentrations and sequenced on a Nextseq 500 system (Illumina, San Diego, CA) or a similar instrument targeting 30 million 75bp reads (60 million paired reads) per sample.
- 9.2.4. Assess sequencing run quality by using Illumina's SAV software.
- 9.2.5. Demultiplex with Illumina's bcl2fastq algorithm (Illumina, San Diego, CA)
- 9.2.6. Process the fastq files by using the QuickRNAseq<sup>3</sup> pipeline utilizing Hg38 for the genome and Gencode v24 for annotation.

## Gastrointestinal Tissue Procurement, Cryopreservation and Utilization SOP

### 10. Lamina Propria Mononuclear Cell Isolation (LPMCs)

10.1. Isolation of LPMCs with separation of epithelial cell and immune cells (short 1 hour digestion protocol)

- 10.1.1. Incubate the thawed biopsy tissue for 15 min on a shaker at 37°C and 225 rpm in 20 mL of prewarmed **epithelial denudation medium** to remove epithelial cells.
- 10.1.2. Filter through a 70-micron filter (the solution contains the epithelial cells that can be saved for future use by spinning down at 1400 rpm for 5 min).
- 10.1.3. Incubate the leftover biopsy pieces on a shaker for 30 min at 37°C and 225 rpm in **digest medium (high enzyme)**.
- 10.1.4. Vortex the solution for 10 seconds.
- 10.1.5. Filter through a 70-micron strainer.
- 10.1.6. Homogenize the samples onto the strainer by pressing with the back of a 5 mL plastic syringe piston.
- 10.1.7. Rinse the strainer with 10 mL **T-cell media** to collect remaining LPMCs.
- 10.1.8. Spin down at 1400 rpm for 5 min and discard the supernatant carefully not to dislodge the pellet that can be very small.
- 10.1.9. Wash twice with **T-cell media** by spinning at 1400 rpm for 5 min in between washes.
- 10.1.10. Resuspend in **PBS**.

10.2. Isolation of LPMCs with separation of epithelial cell and immune cells (overnight digestion protocol)

- 10.2.1. Incubate the thawed biopsy tissue for 15 min at 37°C in 20 mL of prewarmed **epithelial denudation medium** to remove epithelial cells.
- 10.2.2. Filter through a 70-micron filter (the solution contains the epithelial cells that can be saved for future use by spinning down at 1400 rpm for 5 min).
- 10.2.3. Incubate the leftover biopsy pieces on a shaker overnight at 37°C and 225 rpm in **digest medium (low enzyme)**.
- 10.2.4. Pass the remaining pieces through a 10 ml pipette 10 times to break up the remaining tissue.
- 10.2.5. Incubate for another hour back on the shaker.
- 10.2.6. Vortex the solution for 30 seconds.
- 10.2.7. Filter through a 70-micron strainer.
- 10.2.8. Homogenize the samples onto the strainer by pressing with the back of a 5 mL plastic syringe piston.
- 10.2.9. Rinse the strainer with 10 mL **T-cell media** to collect remaining LPMCs.
- 10.2.10. Spin down at 1400 rpm for 5 min and discard the supernatant carefully not to dislodge the pellet that can be very small.
- 10.2.11. Wash twice with **T-cell media** by spinning at 1400 rpm for 5 min in between washes.
- 10.2.12. Resuspend in **PBS**.

## Gastrointestinal Tissue Procurement, Cryopreservation and Utilization SOP

### 10.3. Single cell preparations from tissue without epithelial separation (overnight digestion)

- 10.3.1. Incubate the thawed biopsy pieces on a shaker overnight at 37°C and 225 rpm in **digest medium (low enzyme)**.
- 10.3.2. Pass the remaining pieces through a 10 ml pipette 10 times to break up the remaining tissue.
- 10.3.3. Incubate for another hour back on the shaker.
- 10.3.4. Vortex the solution for 10 seconds.
- 10.3.5. Filter through a 70-micron strainer.
- 10.3.6. Homogenize the samples onto the strainer by pressing with the back of a 5 mL plastic syringe piston.
- 10.3.7. Rinse the strainer with 10 mL of **T-cell media** to collect remaining LPMC.
- 10.3.8. Spin down at 1400 rpm x 5 min and discard the supernatant carefully not to dislodge the pellet that can be very small.
- 10.3.9. Wash twice with **T-cell media** by spinning at 1400 rpm for 5 min in between washes.
- 10.3.10. Resuspend in **PBS**.

### 11. References

1. Miyoshi H, Stappenbeck TS. The young and the Wnt-less: transplantable fetal intestinal spheroids without Wnts. *Cell Stem Cell* 2013;13:637-8.
2. Sato T, Clevers H. Primary mouse small intestinal epithelial cell cultures. *Methods Mol Biol* 2013;945:319-28.
3. Zhao S, Xi L, Quan J, et al. QuickRNASeq lifts large-scale RNA-seq data analyses to the next level of automation and interactive visualization. *BMC Genomics* 2016;17:39.

| Subject ID | Age  | Gender | Group          | Dx                                   | Site |
|------------|------|--------|----------------|--------------------------------------|------|
| 56         | 13.2 | Female | Enteroids      | CD                                   | BCH  |
| 309        | 19.5 | Male   | Enteroids      | CD                                   | BCH  |
| 433        | 4.4  | Female | Enteroids      | UC                                   | BCH  |
| 482        | 15.6 | Female | Enteroids      | CD                                   | BCH  |
| 541        | 23.4 | Female | Enteroids      | CD                                   | BCH  |
| 1043       | 17.6 | Female | Enteroids      | UC                                   | BCH  |
| 1055       | 8.2  | Male   | Enteroids      | UC                                   | BCH  |
| 1388       | 5.5  | Female | Enteroids      | CD                                   | BCH  |
| 1459       | 7.9  | Female | Enteroids      | CD                                   | BCH  |
| 1653       | 13.6 | Male   | Enteroids      | UC                                   | BCH  |
| 1755       | 10.5 | Female | Enteroids      | UC                                   | BCH  |
| 1840       | 11.3 | Female | Enteroids      | Indeterminate colitis (IBD-U)        | BCH  |
| 1870       | 12   | Male   | Enteroids      | CD                                   | BCH  |
| 1927       | 11.5 | Male   | Enteroids      | CD                                   | BCH  |
| 1997       | 7.1  | Male   | Enteroids      | CD                                   | BCH  |
| 2112       | 17.6 | Male   | Enteroids      | CD                                   | BCH  |
| 2125       | 15.1 | Male   | Enteroids      | UC                                   | BCH  |
| 2136       | 6.5  | Male   | Enteroids      | UC                                   | BCH  |
| 2187       | 1.3  | Male   | Enteroids      | Stomal obstruction                   | BCH  |
| 2188       | 2.9  | Male   | Enteroids      | Peptic ulcer disease                 | BCH  |
| 2203       | 0.7  | Male   | Enteroids      | Gastroschisis and intestinal atresia | BCH  |
| 2223       | 19.6 | Male   | Enteroids      | sigmoid volvulus                     | BCH  |
| 2228       | 3.8  | Male   | Enteroids      | CD                                   | BCH  |
| 2233       | 0.5  | Male   | Enteroids      | Gastroschisis and intestinal atresia | BCH  |
| 2236       | 10.5 | Female | Enteroids      | CD                                   | BCH  |
| 2245       | 2.3  | Female | Enteroids      | Constipation                         | BCH  |
| 2249       | 3.9  | Female | Enteroids      | Constipation                         | BCH  |
| 2262       | 5.9  | Male   | Enteroids      | Rectal Bleeding                      | BCH  |
| 2291       | 13.4 | Female | Enteroids      | UC                                   | BCH  |
| 2305       | 16.2 | Male   | Enteroids      | Diarrhea                             | BCH  |
| 2309       | 17   | Female | Enteroids      | CD                                   | BCH  |
| 2312       | 0.5  | Female | Enteroids      | Congenital Enteropathy               | BCH  |
| 2321       | 6.3  | Female | Enteroids      | CD                                   | BCH  |
| 2329       | 18.2 | Female | Enteroids      | Functional abdominal pain            | BCH  |
| 2332       | 16.1 | Male   | Enteroids      | Rectal Bleeding                      | BCH  |
| 2341       | 5.5  | Female | Enteroids      | Celiac disease                       | BCH  |
| 2353       | 2.4  | Male   | Enteroids      | UC                                   | BCH  |
| 2355       | 6    | Female | Enteroids      | UC                                   | BCH  |
| 2363       | 14.5 | Male   | Enteroids      | CD                                   | BCH  |
| 2365       | 12.9 | Female | Enteroids      | UC                                   | BCH  |
| 1899       | 16.5 | Female | fresh vs froze | CD                                   | BCH  |



|          |       |         |                 |                                 |                 |
|----------|-------|---------|-----------------|---------------------------------|-----------------|
| 1914     | 17    | Female  | fresh vs frozen | CD                              | BCH             |
| 2156     | 21.9  | Male    | fresh vs frozen | CD                              | BCH             |
| 2157     | 10.2  | Female  | fresh vs frozen | CD                              | BCH             |
| 2170     | 10.6  | Female  | fresh vs frozen | UC                              | BCH             |
| 2185     | 18.4  | Male    | fresh vs frozen | CD                              | BCH             |
| 1137     | 14.2  | Female  | fresh vs frozen | CD                              | BCH             |
| 2027     | 10.6  | Female  | fresh vs frozen | UC                              | BCH             |
| 1909     | 21.8  | Male    | fresh vs frozen | CD                              | BCH             |
| 2121     | 15.9  | Male    | fresh vs frozen | CD                              | BCH             |
| 10026934 | 62    | Male    | fresh vs frozen | CD                              | BWH             |
| 10026955 | 30    | Male    | fresh vs frozen | CD                              | BWH             |
| 10058640 | 68    | Female  | fresh vs frozen | CD                              | BWH             |
| 10058650 | 55    | Female  | fresh vs frozen | CD                              | BWH             |
| 10058652 | 50    | Female  | fresh vs frozen | HC                              | BWH             |
| 10058653 | 46    | Male    | fresh vs frozen | HC                              | BWH             |
| 10058655 | 23    | Female  | fresh vs frozen | UC                              | BWH             |
| 10058665 | 59    | Female  | fresh vs frozen | UC                              | BWH             |
| H310     | Adult |         | Enteroids       | unaffected, did not grow        | MGH             |
| H341     | Adult |         | Enteroids       | used for the "ideal conditions" | MGH             |
| 43821    | 43    | Male    | RNAseq          | UC                              | Pfizer/Benaroya |
| 108776   | 29    | Female  | RNAseq          | UC                              | Pfizer/Benaroya |
| 120143   | 36    | Female  | RNAseq          | UC                              | Pfizer/Benaroya |
| 133724   | 48    | Male    | RNAseq          | UC                              | Pfizer/Benaroya |
| 150329   | 34    | Male    | RNAseq          | UC                              | Pfizer/Benaroya |
| 162573   | 43    | Female  | RNAseq          | UC                              | Pfizer/Benaroya |
| 174784   | 53    | Male    | RNAseq          | UC                              | Pfizer/Benaroya |
| 186931   | 35    | Female  | RNAseq          | UC                              | Pfizer/Benaroya |
| 190398   | 19    | Female  | RNAseq          | UC                              | Pfizer/Benaroya |
| 255220   | 69    | Female  | RNAseq          | UC                              | Pfizer/Benaroya |
| 361179   | 44    | Female  | RNAseq          | UC                              | Pfizer/Benaroya |
| 424848   | 63    | Unknown | RNAseq          | UC                              | Pfizer/Benaroya |
| 468914   | 31    | Unknown | RNAseq          | UC                              | Pfizer/Benaroya |
| 490730   | 33    | Female  | RNAseq          | UC                              | Pfizer/Benaroya |
| 533145   | 59    | Male    | RNAseq          | UC                              | Pfizer/Benaroya |
| 614819   | 33    | Unknown | RNAseq          | UC                              | Pfizer/Benaroya |
| 951932   | 36    | Female  | RNAseq          | UC                              | Pfizer/Benaroya |
| 964151   | 31    | Male    | RNAseq          | UC                              | Pfizer/Benaroya |

| REAGENT or RESOURCE |     |          |                 |
|---------------------|-----|----------|-----------------|
| <b>Antibodies</b>   |     |          |                 |
| Target              | Tag | Clone    | SOURCE          |
| CD45                | 89  | HI30     | Fluidigm        |
| CD45                | 89  | HI30     | Fluidigm        |
| CD44                | 115 | IM7      | Core, self conj |
| CD44                | 115 | IM7      | Core, self conj |
| c-kit               | 141 | 104D2    | core, cust      |
| c-kit               | 141 | 104D2    | core, self conj |
| CD19                | 142 | HIB19    | Core            |
| CD19                | 142 | HIB19    | Core            |
| HLA-DR              | 143 | L243     | Fluidigm        |
| HLA-DR              | 143 | L243     | Fluidigm        |
| TNFa                | 144 | Mab11    | Core            |
| CD64                | 144 | 10.1     | Core            |
| cRTH2               | 145 | BM16     | core, cust      |
| CD16                | 145 | 3G8      | Core            |
| CD8a                | 146 | RPA-T8   | Core            |
| CD8a                | 146 | RPA-T8   | Core            |
| CD45RO              | 147 | UCHL1    | Core            |
| CD45RO              | 147 | UCHL1    | Core            |
| CD14                | 148 | RM052    | Fluidigm        |
| CD28                | 148 | CD28.2   | Core            |
| CD25                | 149 | 2A3      | Fluidigm        |
| CD25                | 149 | 2A3      | Fluidigm        |
| IL-22               | 150 | 22URTI   | Fluidigm        |
| CD38                | 150 | HIT2     | Core, self conj |
| CD123               | 151 | 6H6      | Core            |
| CD49b               | 151 | P1E6-C5  | Core            |
| CD152 (CTLA-4)      | 152 | L3D10    | Core            |
| CD14                | 152 | M5E2     | Core            |
| CD45RA              | 153 | HI100    | Core            |
| CD45RA              | 153 | HI100    | Core            |
| CD38                | 154 | HIT2     | Core            |
| CD163               | 154 | GHI/61   | Fluidigm        |
| CD27                | 155 | L128     | Fluidigm        |
| CD27                | 155 | L128     | Fluidigm        |
| CCR4                | 156 | L291H4   | Core            |
| CD8b                | 156 | SIDI8BEE | Core            |
| CD3                 | 158 | UCHT1    | Core            |
| CD3                 | 158 | UCHT1    | Core            |
| CCR7 (cd197)        | 159 | G043H7   | Fluidigm        |

|                           |       |              |                   |
|---------------------------|-------|--------------|-------------------|
| CD11c                     | 159   | Bu15         | Core              |
| INFg                      | 160   | 4S.B3        | Core              |
| AHR                       | 161   | FF3399       | Core              |
| IL-1B                     | 162   | CRM56        | Core, cust        |
| CD56                      | 162   | NCAM16.2     | Core              |
| CD183 (CXCR3)             | 163   | G025H7       | Fluidigm          |
| CD183(CXCR3)              | 163   | G025H7       | Fluidigm          |
| CD161                     | 164   | HP-3G10      | Core              |
| CD161                     | 164   | HP-3G10      | Core              |
| FoxP3                     | 165   | PCH101       | Core              |
| CD24                      | 166   | ML5          | Fluidigm          |
| CD24                      | 166   | ML5          | Fluidigm          |
| LAG-3                     | 167   | 3DS223H      | Core, cust        |
| LAG-3                     | 167   | 3DS223H      | Core, self conj   |
| CCR6                      | 168   | G034E3       | Core              |
| CCR6                      | 168   | G034E3       | Core              |
| IL17a                     | 169   | BL168        | Core              |
| CCR7                      | 170   | G043H7       | Core              |
| CD127                     | 171   | eBioRDR5     | Core              |
| CD127                     | 171   | eBioRDR5     | Core              |
| IL21                      | 172   | 3A3-N2       | Fluidigm          |
| IgM                       | 172   | MHM-88       | Core              |
| CD335 (NKp46)             | 173   | 9E2          | Core, cust        |
| CD335                     | 173   | 9E2          | Core, costum conj |
| CD4                       | 174   | SK3          | Fluidigm          |
| CD4                       | 174   | SK3          | Fluidigm          |
| Tbet                      | 175   | 4B10         | Core              |
| IgD                       | 175   | IA6-2        | Core              |
| CD56                      | 176   | N901         | fluidigm          |
| CXCR5                     | 209   | MU5UBEE      | Core, custom conj |
| CXCR5                     | 209   | MU5UBEE      | Core, custom conj |
| Anti-human CD4-PE-Cy5     |       | Clone OKT3   | Biolegend         |
| Anti-human CD8-eVolve-655 |       | Clone RPA-T8 | eBioscience       |
| CD57                      | 113In | HCD57        | Biolegend         |
| HLA-ABC                   | 115In | W6/32        | Biolegend         |
| CD326                     | 141Pr | Ep-CAM       | Biolegend         |
| CD19                      | 142Nd | HIB19        | Biolegend         |
| CD45RA                    | 143Nd | HI100        | Biolegend         |
| CD141                     | 144Nd | M80          | Biolegend         |
| CD4                       | 145Nd | RPA-T4       | Biolegend         |
| CD8a                      | 146Nd | RPA-T8       | Biolegend         |
| IgA                       | 147Sm | 9H9H11       | Biolegend         |

|                                                      |       |                |                                     |
|------------------------------------------------------|-------|----------------|-------------------------------------|
| CD16                                                 | 148Nd | 3G8            | Biolegend                           |
| CD127                                                | 149Sm | A019D5         | Biolegend                           |
| FceR1a                                               | 149Sm | AER-37 (CRA-1) | Biolegend                           |
| CD1c                                                 | 150Nd | L161           | Biolegend                           |
| CD123                                                | 151Eu | 6H6            | Biolegend                           |
| CD66b                                                | 152Sm | G10F5          | Biolegend                           |
| PD-1                                                 | 153Eu | EH12.2H7       | Biolegend                           |
| CD86                                                 | 154Sm | IT2.2          | Biolegend                           |
| CXCR4                                                | 154Sm | 12G8           | Biolegend                           |
| CD27                                                 | 155Gd | O323           | Biolegend                           |
| CD33                                                 | 158Gd | WM53           | Biolegend                           |
| CD103                                                | 159Tb | Ber-Act8       | Biolegend                           |
| CD14                                                 | 160Gd | M5E2           | Biolegend                           |
| CD56                                                 | 161Dy | B159           | Biolegend                           |
| CD64                                                 | 162Dy | 10.1           | Biolegend                           |
| CD172a/b                                             | 163Dy | SIRPa/b        | Biolegend                           |
| CD161                                                | 164Dy | HP-3G10        | Fluidigm                            |
| CD69                                                 | 164Dy | FN50           | Biolegend                           |
| CD25                                                 | 166Er | M-A251         | Biolegend                           |
| CD11c                                                | 167Er | Bu15           | Biolegend                           |
| CD3                                                  | 168Er | UCHT1          | Biolegend                           |
| integrin b7                                          | 169Tm | FIB504         | Biolegend                           |
| CD38                                                 | 170Er | HB-7           | Biolegend                           |
| CD206                                                | 172Yb | 15-2           | Biolegend                           |
| HLADR                                                | 174Yb | L243           | Biolegend                           |
| CD58                                                 | 175Lu | TS2/9          | Biolegend                           |
| CD54                                                 | 176Yb | HCD54          | Biolegend                           |
| CD11b                                                | 209Bi | ICRF44         | Fluidigm                            |
| CD45                                                 | 89Y   | HI30           | Fluidigm                            |
| <b>REAGENT or RESOURCE</b>                           |       |                | <b>SOURCE</b>                       |
| <b>Biological Samples</b>                            |       |                |                                     |
| Human intestinal biopsies and tissue                 |       |                | BCH, BWH                            |
| Human intestinal biopsies                            |       |                | UPENN Immunology in IBD Initiative  |
| Human intestinal biopsies                            |       |                | Benaroya Research Institute at VMMC |
| Human intestinal biopsies                            |       |                | Icahn School of Medicine (MSSM)     |
| <b>Chemicals, Peptides, and Recombinant Proteins</b> |       |                |                                     |
| DNAse                                                |       |                | Qiagen                              |
| Collagenase                                          |       |                | Sigma                               |
| low Barium PBS (1x)                                  |       |                | ThermoScientific                    |
| Bovine Serum Albumin, protease free                  |       |                | Sigma                               |
| Sodium Azide                                         |       |                | Sigma                               |
| RPMI                                                 |       |                | Life Technologies                   |

|                                            |                                           |
|--------------------------------------------|-------------------------------------------|
| glutamax                                   | ThermoFisher                              |
| Penstrep                                   | ThermoFisher                              |
| HEPES                                      | Life Technologies                         |
| NEAA                                       | Life Technologies                         |
| Sodium pyruvate                            | Life Technologies                         |
| Formaldehyde (40% solution)                | Fisher Scientific                         |
| Rh103 intercalator                         | Thermo                                    |
| Fc-Block                                   | Biolegend                                 |
| MilliQ Water (low barium)                  |                                           |
| EQ 4 Elemental Beads                       | Fluidigm                                  |
| 100% methanol                              | Fisher                                    |
| Intercalator-Ir 125 uM                     | Fluidigm                                  |
| PMA                                        | Sigma Aldrich                             |
| Ionomycin                                  | Sigma                                     |
| Foxp3 fix perm diluent                     | Thermo                                    |
| Foxp3 fix perm concentrate                 | Thermo                                    |
| Foxp3 wash buffer                          | Thermo                                    |
| Collagenase Type 1                         | Gibco                                     |
| Growth Factor Reduced Phenol Red Free Matr | Corning                                   |
| Corning Cell Recovery Solution             | Corning                                   |
| L-NRW Conditioned Medium                   | Miyoshi and Stappenbeck, Nat. Protoc., 20 |
| Advanced DMEM/F12                          | Gibco                                     |
| GlutaMax                                   | Gibco                                     |
| N2                                         | Gibco                                     |
| HEPES                                      | Gibco                                     |
| Nicotinamide                               | Sigma                                     |
| B27                                        | Gibco                                     |
| Primocin                                   | Invivogen                                 |
| Normocin                                   | Invivogen                                 |
| N-Acetyl Cysteine                          | Sigma                                     |
| A-83-01                                    | Sigma                                     |
| SB202190                                   | Sigma                                     |
| EGF                                        | Peprtech                                  |
| Gastrin                                    | Sigma                                     |
| DMSO                                       | Sigma                                     |
| Fetal Bovine Serum (FBS)                   | Gibco                                     |
| RNAlater                                   | Qiagen                                    |
| Deoxyribonuclease I from Bovine Pancreas   | Sigma-Aldrich                             |
| Collagenase/Dispase                        | Roche                                     |
| DTT (dithiothreitol)                       | ThermoFisher                              |
| RPMI 1640                                  | Corning                                   |
| GemCell U.S. Origin Fetal Bovine Serum     | Gemini                                    |

|                                               |                                        |
|-----------------------------------------------|----------------------------------------|
| UltraPure 0.5M EDTA, pH 8.0                   | Invitrogen                             |
| Penicillin-Streptomycin (10,000 U/mL)         | Gibco                                  |
| ACK Lysing Buffer                             | Thermo Fisher                          |
| L-Glutamine (200mM)                           | Lonza                                  |
| Dulbecco's Phosphate-Buffered Saline, 1X      | Corning                                |
| Percoll                                       | Sigma-Aldrich                          |
| <b>Critical Commercial Assays</b>             |                                        |
| Fixation and Permeabilization Solution        | BD Biosciences                         |
| Fixation and Permeabilization Wash            | BD Biosciences                         |
| Brefeldin A Protein Transport Inhibitor       | BD Biosciences                         |
| Monensin Protein Transport Inhibitor          | BD Biosciences                         |
| LIVE/DEAD Fixable Aqua Dead Stain Kit         | Invitrogen                             |
| miRNA kit                                     | Qiagen                                 |
| Truseq Total RNAseq kit                       | Illumina                               |
| Ribo-Zero                                     | Illumina                               |
| TapeStation System                            | Agilent                                |
| <b>Deposited Data</b>                         |                                        |
| N/A                                           |                                        |
| <b>Experimental Models: Cell Lines</b>        |                                        |
| N/A                                           |                                        |
| <b>Experimental Models: Organisms/Strains</b> |                                        |
| N/A                                           |                                        |
| <b>Oligonucleotides</b>                       |                                        |
| N/A                                           |                                        |
| <b>Recombinant DNA</b>                        |                                        |
| N/A                                           |                                        |
| <b>Software and Algorithms</b>                |                                        |
| Cytobank                                      |                                        |
| Pydio                                         |                                        |
| EVOS FL Auto 2                                | Thermofischer                          |
| FlowJo                                        | LLC                                    |
| GraphPad Prism                                | GraphPad                               |
| SAV software                                  | Illumina                               |
| bcl2fastq algorithm                           | Illumina                               |
| Quick RNAseq                                  | Zhao et al                             |
| EdgeR 3.12 algorithm                          | Law et al (2014), Ritchie et al (2015) |
| tmod R package                                |                                        |
| ggplot2                                       |                                        |
| <b>Other</b>                                  |                                        |
| Fragment Analyzer                             | Advanced Analytical                    |
| Homogenizer                                   | Bertin Precellys                       |
| CyTOF 2 Mass Cytometer                        | Fluidigm                               |

Nextseq 500 system

Illumina

|                                         |
|-----------------------------------------|
|                                         |
|                                         |
| <b>IDENTIFIER</b>                       |
| CAT#3089003B; RRID:AB_2661851           |
| CAT#3089003B; RRID:AB_2661852           |
| CAT#103051 (biolegend); RRID:AB_2562799 |
| CAT#103051 (biolegend); RRID:AB_2562799 |
| CAT#313223 (Biolegend); RRID:AB_313223  |
| CAT#313223 (Biolegend); RRID:AB_313223  |
|                                         |
|                                         |
| CAT#3143013B; RRID:AB_2661810           |
| CAT#3143013B; RRID:AB_2661810           |
|                                         |
|                                         |
|                                         |
|                                         |
|                                         |
|                                         |
|                                         |
|                                         |
| CAT#3148010B                            |
|                                         |
| CAT#3149010B                            |
| CAT#3149010B                            |
| CAT#3150007B                            |
|                                         |
|                                         |
|                                         |
|                                         |
|                                         |
|                                         |
|                                         |
|                                         |
|                                         |
| CAT#3154007B; RRID:AB_2661797           |
| CAT#3155001B; RRID:AB_2687645           |
| CAT#3155001B; RRID:AB_2687645           |
|                                         |
|                                         |
|                                         |
|                                         |
| CAT# 3159003A; RRID:AB_2714155          |

|                    |
|--------------------|
| BCH General Panel  |
| MSSM               |
| BCH Cytokine Panel |
| Upenn              |



|                                                 |
|-------------------------------------------------|
|                                                 |
|                                                 |
|                                                 |
|                                                 |
|                                                 |
| CAT#3163004B                                    |
| CAT#3163004B                                    |
|                                                 |
|                                                 |
|                                                 |
| CAT#3166007B; RRID:AB_2661803                   |
| CAT#3166007B; RRID:AB_2661803                   |
| CAT#3167010C (Fluidigm)                         |
| CAT#3167010C (Fluidigm)                         |
|                                                 |
|                                                 |
|                                                 |
|                                                 |
|                                                 |
| CAT#3172011B                                    |
|                                                 |
| CAT#331902 (Biolegend); RRID:AB_1027637         |
| CAT#331902 (Biolegend); RRID:AB_1027637         |
| CAT#3174004B; RRID:AB_2687862                   |
| CAT#3174004B; RRID:AB_2687862                   |
|                                                 |
|                                                 |
| CAT#3176009B                                    |
| CAT#14-9185-82 (Thermo Fisher); RRID:AB_2572941 |
| CAT#14-9185-82 (Thermo Fisher); RRID:AB_2572941 |
| CAT# 317412; RRID:AB_571957                     |
| CAT# 86-0088-42; RRID:AB_2574786                |
| CAT#322302; RRID:AB_2661815                     |
| CAT#311402;RRIF: AB_314871                      |
| CAT#324202; RRID:AB_756076                      |
| CAT#302202; RRID:AB_2661817                     |
| CAT#304102;RRID:AB_314406                       |
| CAT#344102; RRID:AB_2661788                     |
| CAT#300502; RRID:AB_314070                      |
| CAT#301002; RRID:AB_2661818                     |
| CAT#409702; RRID:AB_2564448                     |

|                               |
|-------------------------------|
| CAT#302014; RRID:AB_314214    |
| CAT#351302; RRID:AB_10718513  |
| CAT#334602; RRID:AB_1227649   |
| CAT#331502; RRID:AB_2661821   |
| CAT#306002; RRID:AB_2661822   |
| CAT#305102; RRID:AB_2661823   |
| CAT#329912; RRID:AB_961417    |
| CAT#305402; RRID:AB_314522    |
| CAT#306512; RRID:AB_2292651   |
| CAT#302802; RRID:AB_2661825   |
| CAT#303402; RRID:AB_314346    |
| CAT#350202; RRID:AB_10639864  |
| CAT#301810; RRID:AB_314192    |
| CAT#555513; RRID:AB_2661829   |
| CAT#305002; RRID:AB_314486    |
| CAT#323802; RRID:AB_830701    |
| CAT#3164009B; RRID:AB_2687651 |
| CAT#310902; RRID:AB_314837    |
| CAT356102; RRID:AB_2661833    |
| CAT#337202; RRID:AB_1236381   |
| CAT#300402; RRID:AB_2661835   |
| CAT#321202; RRID:AB_571975    |
| CAT#356602; RRID:AB_2661836   |
| CAT#321102; RRID:AB_571923    |
| CAT#307602; RRID:AB_314680    |
| CAT#330902; RRID:AB_1186186   |
| CAT#322702; RRID:AB_535974    |
| 3209003B; RRID:AB_2687654     |
| 3089003B; RRID:AB_2661851     |
| <b>IDENTIFIER</b>             |
|                               |
| N/A                           |
| N/A                           |
| N/A                           |
| N/A                           |
|                               |
| 79254                         |
| C2139-5G                      |
| 10010-049                     |
| A9647-50G                     |
| 71289                         |
| 11875-119                     |

|            |
|------------|
| 35050-061  |
| 15140-122  |
| 15630-080  |
| 11140-050  |
| 11360-070  |
| F79-500    |
| GAS001S100 |
| 422302     |
|            |
| 201078     |
| A433P4     |
| 201192A    |
| P8139      |
| 10634-1mg  |
| GAS001S100 |
| GAS001S100 |
| GAS001S100 |
| 107100017  |
| 356231     |
| 354253     |

Protoc., 2013

|                   |
|-------------------|
| 12634028          |
| 35050061          |
| 17502048          |
| 15630080          |
| N0636             |
| 12587010          |
| ant-pm-2          |
| ant-nr-2          |
| A7250             |
| SML0788           |
| S7067             |
| 315-09            |
| G9145             |
| D2650-100 mL      |
| 16000044          |
| <b>76106</b>      |
| Cat # D5025       |
| Cat # 11097113001 |
| Cat # R0861       |
| Cat # 15-040-CM   |
| Cat # 100-500     |

|                                                                                                                                                                                                                              |
|------------------------------------------------------------------------------------------------------------------------------------------------------------------------------------------------------------------------------|
| Cat # 15575-038                                                                                                                                                                                                              |
| Cat # 151401-22                                                                                                                                                                                                              |
| Cat # A1049201                                                                                                                                                                                                               |
| Cat # 17605E                                                                                                                                                                                                                 |
| Cat # 21-031-CM                                                                                                                                                                                                              |
| Cat # P4937                                                                                                                                                                                                                  |
|                                                                                                                                                                                                                              |
| Cat # 554722                                                                                                                                                                                                                 |
| Cat # 554723                                                                                                                                                                                                                 |
| Cat # 555029                                                                                                                                                                                                                 |
| Cat # 554724                                                                                                                                                                                                                 |
| Cat # L34957                                                                                                                                                                                                                 |
|                                                                                                                                                                                                                              |
|                                                                                                                                                                                                                              |
|                                                                                                                                                                                                                              |
|                                                                                                                                                                                                                              |
|                                                                                                                                                                                                                              |
|                                                                                                                                                                                                                              |
|                                                                                                                                                                                                                              |
|                                                                                                                                                                                                                              |
|                                                                                                                                                                                                                              |
|                                                                                                                                                                                                                              |
|                                                                                                                                                                                                                              |
|                                                                                                                                                                                                                              |
|                                                                                                                                                                                                                              |
|                                                                                                                                                                                                                              |
|                                                                                                                                                                                                                              |
|                                                                                                                                                                                                                              |
|                                                                                                                                                                                                                              |
|                                                                                                                                                                                                                              |
|                                                                                                                                                                                                                              |
|                                                                                                                                                                                                                              |
|                                                                                                                                                                                                                              |
|                                                                                                                                                                                                                              |
|                                                                                                                                                                                                                              |
| RRID:SCR_014043; <a href="http://www.cytobank.org/index.html">http://www.cytobank.org/index.html</a>                                                                                                                         |
| <a href="https://distrib.dfci.harvard.edu/">https://distrib.dfci.harvard.edu/</a>                                                                                                                                            |
|                                                                                                                                                                                                                              |
| Version 10.3; RRID:SCR_008520; <a href="https://www.flowjo.com/solutions/flowjo">https://www.flowjo.com/solutions/flowjo</a>                                                                                                 |
| Version 7; RRID:SCR_002798; <a href="http://www.graphpad.com/">http://www.graphpad.com/</a>                                                                                                                                  |
| Version 2.1.8, <a href="https://support.illumina.com/downloads/sequencing-analysis-viewer-software-v2-18.html">https://support.illumina.com/downloads/sequencing-analysis-viewer-software-v2-18.html</a>                     |
| RRID:SCR_015058; <a href="https://support.illumina.com/sequencing/sequencing_software/bcl2fastq-conversion-software.html">https://support.illumina.com/sequencing/sequencing_software/bcl2fastq-conversion-software.html</a> |
| version 1.2; <a href="https://sourceforge.net/projects/quicknaseq/">https://sourceforge.net/projects/quicknaseq/</a>                                                                                                         |
| RRID:SCR_012802; <a href="http://bioconductor.org/packages/edgeR/">http://bioconductor.org/packages/edgeR/</a>                                                                                                               |
| v 0.31, <a href="https://cran.r-project.org/web/packages/tmod/index.html">https://cran.r-project.org/web/packages/tmod/index.html</a>                                                                                        |
| v 2.2.1, <a href="https://cran.r-project.org/web/packages/ggplot2/index.html">https://cran.r-project.org/web/packages/ggplot2/index.html</a>                                                                                 |
|                                                                                                                                                                                                                              |
|                                                                                                                                                                                                                              |
|                                                                                                                                                                                                                              |
|                                                                                                                                                                                                                              |

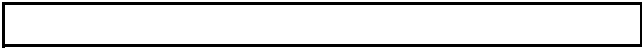

Supplement: NIHMS1020410-supplement-Supplementary_Figures.pdf [file NIHMS1020410-supplement-Supplementary_Figures.pdf]
